# Supplementary material
Source: publisher figshare collection journal article supplement (https://acs.figshare.com/ndownloader/files/4161994)
Supplement: Supplementary file 1 [file 4161994]

data_[MeGa(-O(2-C6H4)-CH-N(2-C6H4)-O-)]


_audit_creation_method            SHELXL-97
_chemical_name_systematic
;
 ?
;
_chemical_name_common             ?
_chemical_melting_point           ?
_chemical_formula_moiety          ?
_chemical_formula_sum
 'C29 H24 Cl2 Ga2 N2 O4'
_chemical_formula_weight          674.84
 
loop_
 _atom_type_symbol
 _atom_type_description
 _atom_type_scat_dispersion_real
 _atom_type_scat_dispersion_imag
 _atom_type_scat_source
 'C'  'C'   0.0033   0.0016
 'International Tables Vol C Tables 4.2.6.8 and 6.1.1.4'
 'H'  'H'   0.0000   0.0000
 'International Tables Vol C Tables 4.2.6.8 and 6.1.1.4'
 'N'  'N'   0.0061   0.0033
 'International Tables Vol C Tables 4.2.6.8 and 6.1.1.4'
 'O'  'O'   0.0106   0.0060
 'International Tables Vol C Tables 4.2.6.8 and 6.1.1.4'
 'Ga'  'Ga'   0.2307   1.6083
 'International Tables Vol C Tables 4.2.6.8 and 6.1.1.4'
 'Cl'  'Cl'   0.1484   0.1585
 'International Tables Vol C Tables 4.2.6.8 and 6.1.1.4'
 
_symmetry_cell_setting                 triclinic
_symmetry_space_group_name_H-M        'P -1'
_symmetry_space_group_name_Hall       '-P 1'
_symmetry_Int_Tables_number            2
 
loop_
 _symmetry_equiv_pos_as_xyz
 'x, y, z'
 '-x, -y, -z'
 
_cell_length_a                    9.892(7)
_cell_length_b                    10.000(6)
_cell_length_c                    16.950(6)
_cell_angle_alpha                 92.02(4)
_cell_angle_beta                  103.59(4)
_cell_angle_gamma                 117.61(4)
_cell_volume                      1423.8(16)
_cell_formula_units_Z             2
_cell_measurement_temperature     298(2)
_cell_measurement_reflns_used          25
_cell_measurement_theta_min            7.7
_cell_measurement_theta_max            12.4
 
_exptl_crystal_description            'block'
_exptl_crystal_colour                 'yellow'
_exptl_crystal_size_max           0.40
_exptl_crystal_size_mid           0.40
_exptl_crystal_size_min           0.20
_exptl_crystal_density_meas       ?
_exptl_crystal_density_diffrn     1.574
_exptl_crystal_density_method     'not measured'
_exptl_crystal_F_000              680
_exptl_absorpt_coefficient_mu     2.117
_exptl_absorpt_correction_type         psi-scans
_exptl_absorpt_process_details         '(North, Phillips & Mathews, 1968)'
_exptl_absorpt_correction_T_min   0.4847
_exptl_absorpt_correction_T_max   0.6768

 
_exptl_special_details
;
 ?
;
 
_diffrn_ambient_temperature       298(2)
_diffrn_radiation_wavelength      0.71069
_diffrn_radiation_type            MoK\a
_diffrn_radiation_source          'fine-focus sealed tube'
_diffrn_radiation_monochromator   graphite
_diffrn_measurement_device_type       'Rigaku AFC7S'
_diffrn_measurement_method             \w-2\q
_diffrn_detector_area_resol_mean  ?
_diffrn_standards_number               3
_diffrn_standards_interval_count       150
_diffrn_standards_decay_%              -4.25
_diffrn_reflns_number             7792
_diffrn_reflns_av_R_equivalents   0.0771
_diffrn_reflns_av_sigmaI/netI     0.0991
_diffrn_reflns_limit_h_min        -12
_diffrn_reflns_limit_h_max        12
_diffrn_reflns_limit_k_min        -12
_diffrn_reflns_limit_k_max        12
_diffrn_reflns_limit_l_min        -21
_diffrn_reflns_limit_l_max        12
_diffrn_reflns_theta_min          2.51
_diffrn_reflns_theta_max          27.52
_reflns_number_total              6527
_reflns_number_gt                 3752
_reflns_threshold_expression      >2sigma(I)
 
_computing_data_collection            'WinAFC'
_computing_cell_refinement            'WinAFC'
_computing_data_reduction             'CrystalStructure'
_computing_structure_solution         'SIR 92'
_computing_structure_refinement   'SHELXL-97 (Sheldrick, 1997)'
_computing_molecular_graphics     'Ortep 3.0 for windows'
_computing_publication_material   'WinGX 1.70.01'
 
_refine_special_details
;
 Refinement of F^2^ against ALL reflections.  The weighted R-factor wR and
 goodness of fit S are based on F^2^, conventional R-factors R are based
 on F, with F set to zero for negative F^2^. The threshold expression of
 F^2^ > 2sigma(F^2^) is used only for calculating R-factors(gt) etc. and is
 not relevant to the choice of reflections for refinement.  R-factors based
 on F^2^ are statistically about twice as large as those based on F, and R-
 factors based on ALL data will be even larger.
;
 
_refine_ls_structure_factor_coef  Fsqd
_refine_ls_matrix_type            full
_refine_ls_weighting_scheme       calc
_refine_ls_weighting_details
 'calc w=1/[\s^2^(Fo^2^)+(0.0673P)^2^+5.7026P] where P=(Fo^2^+2Fc^2^)/3'
_atom_sites_solution_primary      direct
_atom_sites_solution_secondary    difmap
_atom_sites_solution_hydrogens    geom
_refine_ls_hydrogen_treatment     constr
_refine_ls_extinction_method      SHELXL
_refine_ls_extinction_coef        ?
_refine_ls_extinction_expression
 'Fc^*^=kFc[1+0.001xFc^2^\l^3^/sin(2\q)]^-1/4^'
_refine_ls_number_reflns          6527
_refine_ls_number_parameters      364
_refine_ls_number_restraints      0
_refine_ls_R_factor_all           0.1332
_refine_ls_R_factor_gt            0.0591
_refine_ls_wR_factor_ref          0.1958
_refine_ls_wR_factor_gt           0.1491
_refine_ls_goodness_of_fit_ref    1.017
_refine_ls_restrained_S_all       1.017
_refine_ls_shift/su_max           0.000
_refine_ls_shift/su_mean          0.000
 
loop_
 _atom_site_label
 _atom_site_type_symbol
 _atom_site_fract_x
 _atom_site_fract_y
 _atom_site_fract_z
 _atom_site_U_iso_or_equiv
 _atom_site_adp_type
 _atom_site_occupancy
 _atom_site_symmetry_multiplicity
 _atom_site_calc_flag
 _atom_site_refinement_flags
 _atom_site_disorder_assembly
 _atom_site_disorder_group
Ga1 Ga 0.58760(9) 0.65081(8) 0.06960(4) 0.0457(2) Uani 1 1 d . . .
Ga2 Ga 0.60403(8) 0.55492(8) 0.43538(4) 0.0434(2) Uani 1 1 d . . .
O2 O 0.6020(6) 0.5556(5) -0.0329(3) 0.0533(12) Uani 1 1 d . . .
O4 O 0.5896(5) 0.4626(6) 0.5388(3) 0.0525(11) Uani 1 1 d . . .
O3 O 0.6535(6) 0.7491(6) 0.4060(4) 0.0605(13) Uani 1 1 d . . .
O1 O 0.4610(6) 0.7293(5) 0.0977(4) 0.0683(15) Uani 1 1 d . . .
N2 N 0.8390(6) 0.6389(6) 0.4979(3) 0.0479(13) Uani 1 1 d . . .
N1 N 0.6890(6) 0.8368(6) 0.0129(3) 0.0462(12) Uani 1 1 d . . .
C22 C 0.8633(7) 0.5595(7) 0.5627(4) 0.0452(14) Uani 1 1 d . . .
C2 C 0.6263(8) 0.9938(8) 0.0923(4) 0.0518(16) Uani 1 1 d . . .
C11 C 0.9024(9) 0.8724(9) -0.1461(5) 0.0625(19) Uani 1 1 d . . .
H11 H 0.9729 0.9454 -0.1700 0.075 Uiso 1 1 calc R . .
C21 C 0.9533(8) 0.7499(9) 0.4788(5) 0.0573(18) Uani 1 1 d . . .
H21 H 1.0567 0.7708 0.5045 0.069 Uiso 1 1 calc R . .
C23 C 0.7255(8) 0.4692(8) 0.5847(4) 0.0442(14) Uani 1 1 d . . .
C13 C 0.7497(7) 0.8088(7) -0.0493(4) 0.0439(14) Uani 1 1 d . . .
C12 C 0.8530(8) 0.9176(8) -0.0867(5) 0.0573(18) Uani 1 1 d . . .
H12 H 0.8882 1.0211 -0.0710 0.069 Uiso 1 1 calc R . .
C16 C 0.9317(8) 0.8439(8) 0.4202(5) 0.0541(17) Uani 1 1 d . . .
C7 C 0.6995(8) 0.9666(8) 0.0343(5) 0.0538(17) Uani 1 1 d . . .
H7 H 0.7584 1.0486 0.0106 0.065 Uiso 1 1 calc R . .
C27 C 1.0049(8) 0.5660(9) 0.6059(5) 0.063(2) Uani 1 1 d . . .
H27 H 1.0976 0.6253 0.5914 0.076 Uiso 1 1 calc R . .
C15 C 0.7856(8) 0.8429(8) 0.3893(4) 0.0493(15) Uani 1 1 d . . .
C1 C 0.5105(9) 0.8770(8) 0.1196(5) 0.0552(18) Uani 1 1 d . . .
C8 C 0.6982(7) 0.6542(7) -0.0738(4) 0.0432(14) Uani 1 1 d . . .
C9 C 0.7455(9) 0.6091(8) -0.1359(5) 0.0546(17) Uani 1 1 d . . .
H9 H 0.7083 0.5059 -0.1537 0.066 Uiso 1 1 calc R . .
C24 C 0.7303(9) 0.3911(9) 0.6502(5) 0.0581(18) Uani 1 1 d . . .
H24 H 0.6389 0.3336 0.6661 0.070 Uiso 1 1 calc R . .
C10 C 0.8483(9) 0.7193(9) -0.1708(5) 0.0603(19) Uani 1 1 d . . .
H10 H 0.8819 0.6900 -0.2119 0.072 Uiso 1 1 calc R . .
C25 C 0.8736(10) 0.4000(10) 0.6919(5) 0.071(2) Uani 1 1 d . . .
H25 H 0.8774 0.3467 0.7355 0.085 Uiso 1 1 calc R . .
C20 C 0.7843(10) 0.9516(9) 0.3388(5) 0.0621(19) Uani 1 1 d . . .
H20 H 0.6897 0.9538 0.3178 0.075 Uiso 1 1 calc R . .
C6 C 0.4350(10) 0.9151(10) 0.1706(5) 0.066(2) Uani 1 1 d . . .
H6 H 0.3549 0.8382 0.1879 0.079 Uiso 1 1 calc R . .
C19 C 0.9177(11) 1.0538(9) 0.3197(5) 0.070(2) Uani 1 1 d . . .
H19 H 0.9132 1.1236 0.2858 0.084 Uiso 1 1 calc R . .
C18 C 1.0591(11) 1.0529(10) 0.3508(6) 0.076(2) Uani 1 1 d . . .
H18 H 1.1502 1.1224 0.3380 0.091 Uiso 1 1 calc R . .
C17 C 1.0657(10) 0.9501(11) 0.4006(6) 0.075(2) Uani 1 1 d . . .
H17 H 1.1620 0.9514 0.4218 0.090 Uiso 1 1 calc R . .
C5 C 0.4801(11) 1.0661(10) 0.1947(5) 0.073(2) Uani 1 1 d . . .
H5 H 0.4311 1.0900 0.2292 0.087 Uiso 1 1 calc R . .
C3 C 0.6650(11) 1.1456(9) 0.1174(6) 0.074(2) Uani 1 1 d . . .
H3 H 0.7400 1.2240 0.0981 0.089 Uiso 1 1 calc R . .
C26 C 1.0096(10) 0.4860(11) 0.6699(6) 0.073(2) Uani 1 1 d . . .
H26 H 1.1047 0.4902 0.6980 0.088 Uiso 1 1 calc R . .
C4 C 0.5950(12) 1.1814(10) 0.1694(6) 0.081(3) Uani 1 1 d . . .
H4 H 0.6254 1.2829 0.1871 0.097 Uiso 1 1 calc R . .
C28 C 0.5392(10) 0.3997(10) 0.3421(5) 0.068(2) Uani 1 1 d . . .
H28A H 0.6311 0.3966 0.3346 0.102 Uiso 1 1 calc R . .
H28B H 0.4884 0.4237 0.2934 0.102 Uiso 1 1 calc R . .
H28C H 0.4662 0.3017 0.3519 0.102 Uiso 1 1 calc R . .
C14 C 0.7406(11) 0.6505(10) 0.1642(5) 0.072(2) Uani 1 1 d . . .
H14A H 0.8012 0.7507 0.1972 0.108 Uiso 1 1 calc R . .
H14B H 0.8110 0.6233 0.1462 0.108 Uiso 1 1 calc R . .
H14C H 0.6859 0.5775 0.1963 0.108 Uiso 1 1 calc R . .
Cl1 Cl 0.0312(6) 0.6231(7) 0.0601(3) 0.185(2) Uani 1 1 d . . .
Cl2 Cl 0.5522(7) 0.0798(7) 0.4364(4) 0.184(2) Uani 1 1 d . . .
C1S C -0.060(2) 0.468(3) 0.0163(16) 0.093(7) Uani 0.50 1 d P . .
C2S C 0.510(3) 0.069(3) 0.518(2) 0.117(9) Uani 0.50 1 d P . .
 
loop_
 _atom_site_aniso_label
 _atom_site_aniso_U_11
 _atom_site_aniso_U_22
 _atom_site_aniso_U_33
 _atom_site_aniso_U_23
 _atom_site_aniso_U_13
 _atom_site_aniso_U_12
Ga1 0.0497(4) 0.0383(4) 0.0460(4) 0.0024(3) 0.0154(3) 0.0183(3)
Ga2 0.0381(4) 0.0490(4) 0.0429(4) 0.0068(3) 0.0113(3) 0.0212(3)
O2 0.058(3) 0.041(2) 0.055(3) 0.000(2) 0.027(2) 0.014(2)
O4 0.041(2) 0.076(3) 0.052(3) 0.021(2) 0.015(2) 0.036(2)
O3 0.046(3) 0.056(3) 0.083(4) 0.025(3) 0.022(3) 0.025(2)
O1 0.066(3) 0.042(3) 0.101(4) 0.008(3) 0.045(3) 0.020(2)
N2 0.038(3) 0.053(3) 0.049(3) 0.002(3) 0.008(2) 0.021(3)
N1 0.044(3) 0.042(3) 0.049(3) 0.005(2) 0.010(2) 0.019(2)
C22 0.041(3) 0.047(3) 0.046(4) 0.004(3) 0.008(3) 0.023(3)
C2 0.057(4) 0.043(3) 0.051(4) -0.001(3) 0.002(3) 0.028(3)
C11 0.054(4) 0.061(5) 0.063(5) 0.016(4) 0.023(4) 0.016(4)
C21 0.033(3) 0.067(5) 0.061(5) 0.003(4) 0.008(3) 0.018(3)
C23 0.044(3) 0.055(4) 0.041(3) 0.009(3) 0.011(3) 0.030(3)
C13 0.041(3) 0.044(3) 0.043(3) 0.011(3) 0.011(3) 0.018(3)
C12 0.050(4) 0.049(4) 0.061(5) 0.009(3) 0.012(3) 0.016(3)
C16 0.044(4) 0.056(4) 0.054(4) 0.001(3) 0.007(3) 0.022(3)
C7 0.053(4) 0.039(3) 0.060(4) 0.002(3) 0.007(3) 0.020(3)
C27 0.038(4) 0.067(5) 0.082(6) 0.019(4) 0.014(4) 0.024(3)
C15 0.046(4) 0.045(3) 0.051(4) 0.005(3) 0.015(3) 0.016(3)
C1 0.054(4) 0.050(4) 0.060(4) -0.005(3) 0.003(3) 0.031(3)
C8 0.037(3) 0.039(3) 0.047(4) 0.007(3) 0.011(3) 0.013(3)
C9 0.061(4) 0.052(4) 0.053(4) 0.007(3) 0.026(3) 0.025(3)
C24 0.053(4) 0.070(5) 0.057(5) 0.024(4) 0.018(3) 0.033(4)
C10 0.055(4) 0.067(5) 0.051(4) 0.006(4) 0.020(3) 0.022(4)
C25 0.063(5) 0.086(6) 0.066(5) 0.026(4) 0.008(4) 0.043(5)
C20 0.074(5) 0.066(5) 0.054(4) 0.011(4) 0.018(4) 0.040(4)
C6 0.062(5) 0.067(5) 0.073(5) -0.002(4) 0.016(4) 0.036(4)
C19 0.083(6) 0.058(5) 0.064(5) 0.012(4) 0.026(5) 0.028(4)
C18 0.066(5) 0.074(6) 0.072(6) 0.020(5) 0.030(5) 0.017(4)
C17 0.049(4) 0.085(6) 0.080(6) 0.020(5) 0.020(4) 0.023(4)
C5 0.081(6) 0.078(6) 0.065(5) -0.018(4) 0.003(4) 0.054(5)
C3 0.087(6) 0.047(4) 0.081(6) -0.002(4) 0.012(5) 0.034(4)
C26 0.053(5) 0.089(6) 0.080(6) 0.020(5) 0.005(4) 0.041(5)
C4 0.093(7) 0.051(5) 0.094(7) -0.013(5) 0.010(6) 0.041(5)
C28 0.066(5) 0.071(5) 0.061(5) 0.002(4) 0.009(4) 0.032(4)
C14 0.082(6) 0.068(5) 0.065(5) 0.009(4) 0.016(4) 0.037(5)
Cl1 0.183(4) 0.235(5) 0.145(4) -0.059(4) -0.026(3) 0.148(4)
Cl2 0.236(6) 0.191(5) 0.203(5) 0.107(4) 0.126(5) 0.132(5)
C1S 0.058(10) 0.087(13) 0.127(19) 0.054(13) 0.031(11) 0.026(10)
C2S 0.097(16) 0.087(15) 0.17(3) -0.015(16) 0.040(17) 0.049(14)
 
_geom_special_details
;
 All esds (except the esd in the dihedral angle between two l.s. planes)
 are estimated using the full covariance matrix.  The cell esds are taken
 into account individually in the estimation of esds in distances, angles
 and torsion angles; correlations between esds in cell parameters are only
 used when they are defined by crystal symmetry.  An approximate (isotropic)
 treatment of cell esds is used for estimating esds involving l.s. planes.
;
 
loop_
 _geom_bond_atom_site_label_1
 _geom_bond_atom_site_label_2
 _geom_bond_distance
 _geom_bond_site_symmetry_2
 _geom_bond_publ_flag
Ga1 O1 1.891(5) . ?
Ga1 C14 1.930(9) . ?
Ga1 O2 1.984(5) 2_665 ?
Ga1 O2 2.018(4) . ?
Ga1 N1 2.059(6) . ?
Ga2 O3 1.887(5) . ?
Ga2 C28 1.937(8) . ?
Ga2 O4 1.995(4) 2_666 ?
Ga2 O4 2.013(5) . ?
Ga2 N2 2.050(5) . ?
O2 C8 1.360(8) . ?
O2 Ga1 1.984(5) 2_665 ?
O4 C23 1.357(7) . ?
O4 Ga2 1.995(4) 2_666 ?
O3 C15 1.312(8) . ?
O1 C1 1.329(8) . ?
N2 C21 1.284(9) . ?
N2 C22 1.418(9) . ?
N1 C7 1.286(8) . ?
N1 C13 1.408(8) . ?
C22 C27 1.391(9) . ?
C22 C23 1.390(9) . ?
C2 C1 1.392(11) . ?
C2 C3 1.405(9) . ?
C2 C7 1.436(10) . ?
C11 C12 1.364(11) . ?
C11 C10 1.378(11) . ?
C21 C16 1.439(11) . ?
C23 C24 1.385(9) . ?
C13 C8 1.396(9) . ?
C13 C12 1.397(9) . ?
C16 C17 1.385(11) . ?
C16 C15 1.412(9) . ?
C27 C26 1.375(12) . ?
C15 C20 1.410(10) . ?
C1 C6 1.412(10) . ?
C8 C9 1.387(9) . ?
C9 C10 1.374(10) . ?
C24 C25 1.387(10) . ?
C25 C26 1.369(12) . ?
C20 C19 1.366(12) . ?
C6 C5 1.375(11) . ?
C19 C18 1.378(13) . ?
C18 C17 1.368(12) . ?
C5 C4 1.362(13) . ?
C3 C4 1.371(13) . ?
Cl1 C1S 1.44(2) . ?
Cl1 C1S 1.71(3) 2_565 ?
Cl2 C2S 1.53(3) . ?
Cl2 C2S 1.62(3) 2_656 ?
C1S C1S 1.33(4) 2_565 ?
C1S Cl1 1.71(3) 2_565 ?
C2S C2S 1.39(4) 2_656 ?
C2S Cl2 1.62(3) 2_656 ?
 
loop_
 _geom_angle_atom_site_label_1
 _geom_angle_atom_site_label_2
 _geom_angle_atom_site_label_3
 _geom_angle
 _geom_angle_site_symmetry_1
 _geom_angle_site_symmetry_3
 _geom_angle_publ_flag
O1 Ga1 C14 113.0(3) . . ?
O1 Ga1 O2 90.1(2) . 2_665 ?
C14 Ga1 O2 110.5(3) . 2_665 ?
O1 Ga1 O2 137.7(3) . . ?
C14 Ga1 O2 109.2(3) . . ?
O2 Ga1 O2 72.6(2) 2_665 . ?
O1 Ga1 N1 89.1(2) . . ?
C14 Ga1 N1 111.7(3) . . ?
O2 Ga1 N1 134.3(2) 2_665 . ?
O2 Ga1 N1 77.7(2) . . ?
O3 Ga2 C28 112.9(3) . . ?
O3 Ga2 O4 90.6(2) . 2_666 ?
C28 Ga2 O4 109.0(3) . 2_666 ?
O3 Ga2 O4 136.4(2) . . ?
C28 Ga2 O4 110.5(3) . . ?
O4 Ga2 O4 72.6(2) 2_666 . ?
O3 Ga2 N2 89.2(2) . . ?
C28 Ga2 N2 110.9(3) . . ?
O4 Ga2 N2 136.6(2) 2_666 . ?
O4 Ga2 N2 78.0(2) . . ?
C8 O2 Ga1 132.4(4) . 2_665 ?
C8 O2 Ga1 116.1(4) . . ?
Ga1 O2 Ga1 107.4(2) 2_665 . ?
C23 O4 Ga2 133.5(4) . 2_666 ?
C23 O4 Ga2 115.7(4) . . ?
Ga2 O4 Ga2 107.40(19) 2_666 . ?
C15 O3 Ga2 125.4(4) . . ?
C1 O1 Ga1 124.5(5) . . ?
C21 N2 C22 123.3(6) . . ?
C21 N2 Ga2 123.3(5) . . ?
C22 N2 Ga2 113.4(4) . . ?
C7 N1 C13 123.7(6) . . ?
C7 N1 Ga1 122.8(5) . . ?
C13 N1 Ga1 113.4(4) . . ?
C27 C22 C23 118.9(6) . . ?
C27 C22 N2 127.9(6) . . ?
C23 C22 N2 113.2(5) . . ?
C1 C2 C3 118.6(7) . . ?
C1 C2 C7 123.4(6) . . ?
C3 C2 C7 117.8(8) . . ?
C12 C11 C10 120.3(7) . . ?
N2 C21 C16 124.2(6) . . ?
O4 C23 C24 122.9(6) . . ?
O4 C23 C22 116.5(6) . . ?
C24 C23 C22 120.5(6) . . ?
C8 C13 C12 119.0(6) . . ?
C8 C13 N1 114.0(6) . . ?
C12 C13 N1 127.0(6) . . ?
C11 C12 C13 120.1(7) . . ?
C17 C16 C15 119.6(7) . . ?
C17 C16 C21 117.2(7) . . ?
C15 C16 C21 122.8(7) . . ?
N1 C7 C2 124.5(7) . . ?
C26 C27 C22 120.8(7) . . ?
O3 C15 C20 118.9(7) . . ?
O3 C15 C16 123.9(7) . . ?
C20 C15 C16 117.2(7) . . ?
O1 C1 C2 123.7(7) . . ?
O1 C1 C6 117.3(7) . . ?
C2 C1 C6 119.0(7) . . ?
O2 C8 C9 123.9(6) . . ?
O2 C8 C13 115.6(6) . . ?
C9 C8 C13 120.4(6) . . ?
C10 C9 C8 119.0(7) . . ?
C23 C24 C25 119.0(7) . . ?
C9 C10 C11 121.1(7) . . ?
C26 C25 C24 121.1(8) . . ?
C19 C20 C15 122.0(8) . . ?
C5 C6 C1 119.9(9) . . ?
C20 C19 C18 119.7(8) . . ?
C17 C18 C19 120.1(8) . . ?
C18 C17 C16 121.4(8) . . ?
C4 C5 C6 121.6(8) . . ?
C4 C3 C2 121.8(9) . . ?
C25 C26 C27 119.7(7) . . ?
C5 C4 C3 119.1(8) . . ?
C1S Cl1 C1S 48.9(12) . 2_565 ?
C2S Cl2 C2S 52.2(13) . 2_656 ?
Cl1 C1S C1S 76.1(19) . 2_565 ?
Cl1 C1S Cl1 131.1(12) . 2_565 ?
C1S C1S Cl1 54.9(19) 2_565 2_565 ?
C2S C2S Cl2 67(2) 2_656 . ?
C2S C2S Cl2 61(2) 2_656 2_656 ?
Cl2 C2S Cl2 127.8(13) . 2_656 ?
 
_diffrn_measured_fraction_theta_max    0.997
_diffrn_reflns_theta_full              27.52
_diffrn_measured_fraction_theta_full   0.997
_refine_diff_density_max    0.846
_refine_diff_density_min   -1.060
_refine_diff_density_rms    0.123


data_[MeGa(-O(2-C6H3OMe-3)-CH-N(2-C6H4)-O-)]

_audit_creation_method            SHELXL-97
_chemical_name_systematic
;
 ?
;
_chemical_name_common             ?
_chemical_melting_point           ?
_chemical_formula_moiety          ?
_chemical_formula_sum
 'C32 H32 Cl4 Ga2 N2 O6'
_chemical_formula_weight          821.84
 
loop_
 _atom_type_symbol
 _atom_type_description
 _atom_type_scat_dispersion_real
 _atom_type_scat_dispersion_imag
 _atom_type_scat_source
 'C'  'C'   0.0033   0.0016
 'International Tables Vol C Tables 4.2.6.8 and 6.1.1.4'
 'H'  'H'   0.0000   0.0000
 'International Tables Vol C Tables 4.2.6.8 and 6.1.1.4'
 'N'  'N'   0.0061   0.0033
 'International Tables Vol C Tables 4.2.6.8 and 6.1.1.4'
 'O'  'O'   0.0106   0.0060
 'International Tables Vol C Tables 4.2.6.8 and 6.1.1.4'
 'Ga'  'Ga'   0.2307   1.6083
 'International Tables Vol C Tables 4.2.6.8 and 6.1.1.4'
 'Cl'  'Cl'   0.1484   0.1585
 'International Tables Vol C Tables 4.2.6.8 and 6.1.1.4'
 
_symmetry_cell_setting                 triclinic
_symmetry_space_group_name_H-M        'P -1'
_symmetry_space_group_name_Hall       '-P 1'
_symmetry_Int_Tables_number            2
 
loop_
 _symmetry_equiv_pos_as_xyz
 'x, y, z'
 '-x, -y, -z'
 
_cell_length_a                    7.711(2)
_cell_length_b                    10.000(8)
_cell_length_c                    11.826(3)
_cell_angle_alpha                 95.25(4)
_cell_angle_beta                  96.89(2)
_cell_angle_gamma                 111.19(3)
_cell_volume                      835.1(7)
_cell_formula_units_Z             1
_cell_measurement_temperature     298(2)
_cell_measurement_reflns_used          25
_cell_measurement_theta_min            8.0
_cell_measurement_theta_max            11.9
 
_exptl_crystal_description            'plate'
_exptl_crystal_colour                 'orange'
_exptl_crystal_size_max           0.50
_exptl_crystal_size_mid           0.40
_exptl_crystal_size_min           0.15
_exptl_crystal_density_meas       ?
_exptl_crystal_density_diffrn     1.634
_exptl_crystal_density_method     'not measured'
_exptl_crystal_F_000              416
_exptl_absorpt_coefficient_mu     1.980
_exptl_absorpt_correction_type         psi-scan
_exptl_absorpt_process_details         '(North, Phillips & Mathews, 1968)'
_exptl_absorpt_correction_T_min   0.4377
_exptl_absorpt_correction_T_max   0.7555

 
_exptl_special_details
;
 ?
;
 
_diffrn_ambient_temperature       298(2)
_diffrn_radiation_wavelength      0.71069
_diffrn_radiation_type            MoK\a
_diffrn_radiation_source          'fine-focus sealed tube'
_diffrn_radiation_monochromator   graphite
_diffrn_measurement_device_type       'Rigaku AFC7S'
_diffrn_measurement_method             \w-2\q
_diffrn_detector_area_resol_mean  ?
_diffrn_standards_number               3
_diffrn_standards_interval_count       150
_diffrn_standards_decay_%              5.90
_diffrn_reflns_number             4825
_diffrn_reflns_av_R_equivalents   0.0683
_diffrn_reflns_av_sigmaI/netI     0.0798
_diffrn_reflns_limit_h_min        -5
_diffrn_reflns_limit_h_max        10
_diffrn_reflns_limit_k_min        -13
_diffrn_reflns_limit_k_max        12
_diffrn_reflns_limit_l_min        -15
_diffrn_reflns_limit_l_max        15
_diffrn_reflns_theta_min          2.61
_diffrn_reflns_theta_max          28.18
_reflns_number_total              3943
_reflns_number_gt                 2964
_reflns_threshold_expression      >2sigma(I)
 
_computing_data_collection            'WinAFC'
_computing_cell_refinement            'WinAFC'
_computing_data_reduction             'CrystalStructure'
_computing_structure_solution         'SIR92'
_computing_structure_refinement   'SHELXL-97 (Sheldrick, 1997)'
_computing_molecular_graphics     'Ortep 3 for Windows'
_computing_publication_material   'WinGX 1.70.01'
 
 
_refine_special_details
;
 Refinement of F^2^ against ALL reflections.  The weighted R-factor wR and
 goodness of fit S are based on F^2^, conventional R-factors R are based
 on F, with F set to zero for negative F^2^. The threshold expression of
 F^2^ > 2sigma(F^2^) is used only for calculating R-factors(gt) etc. and is
 not relevant to the choice of reflections for refinement.  R-factors based
 on F^2^ are statistically about twice as large as those based on F, and R-
 factors based on ALL data will be even larger.
;
 
_refine_ls_structure_factor_coef  Fsqd
_refine_ls_matrix_type            full
_refine_ls_weighting_scheme       calc
_refine_ls_weighting_details
 'calc w=1/[\s^2^(Fo^2^)+(0.0571P)^2^+0.5435P] where P=(Fo^2^+2Fc^2^)/3'
_atom_sites_solution_primary      direct
_atom_sites_solution_secondary    difmap
_atom_sites_solution_hydrogens    geom
_refine_ls_hydrogen_treatment     mixed
_refine_ls_extinction_method      none
_refine_ls_extinction_coef        ?
_refine_ls_number_reflns          3943
_refine_ls_number_parameters      212
_refine_ls_number_restraints      0
_refine_ls_R_factor_all           0.0749
_refine_ls_R_factor_gt            0.0455
_refine_ls_wR_factor_ref          0.1286
_refine_ls_wR_factor_gt           0.1147
_refine_ls_goodness_of_fit_ref    0.997
_refine_ls_restrained_S_all       0.997
_refine_ls_shift/su_max           0.000
_refine_ls_shift/su_mean          0.000
 
loop_
 _atom_site_label
 _atom_site_type_symbol
 _atom_site_fract_x
 _atom_site_fract_y
 _atom_site_fract_z
 _atom_site_U_iso_or_equiv
 _atom_site_adp_type
 _atom_site_occupancy
 _atom_site_symmetry_multiplicity
 _atom_site_calc_flag
 _atom_site_refinement_flags
 _atom_site_disorder_assembly
 _atom_site_disorder_group
Ga1 Ga 0.65955(6) 0.61602(4) 0.44387(3) 0.03325(13) Uani 1 1 d . . .
Cl1 Cl 0.5134(3) 0.68775(19) 0.97176(17) 0.1068(6) Uani 1 1 d . . .
Cl2 Cl 0.8846(3) 0.8686(2) 1.0892(2) 0.1405(10) Uani 1 1 d . . .
O1 O 0.6524(4) 0.7733(3) 0.3718(2) 0.0452(6) Uani 1 1 d . . .
O2 O 0.6113(4) 0.4704(2) 0.5674(2) 0.0365(5) Uani 1 1 d . . .
O3 O 0.5381(5) 0.9280(3) 0.2422(3) 0.0601(8) Uani 1 1 d . . .
N1 N 0.7929(4) 0.7421(3) 0.5927(3) 0.0355(6) Uani 1 1 d . . .
C1 C 0.6899(5) 0.9044(3) 0.4179(3) 0.0355(7) Uani 1 1 d . . .
C2 C 0.7826(5) 0.9602(3) 0.5312(3) 0.0371(8) Uani 1 1 d . . .
C8 C 0.7331(5) 0.5258(4) 0.6662(3) 0.0348(7) Uani 1 1 d . . .
C5 C 0.6752(6) 1.1322(4) 0.3928(4) 0.0524(11) Uani 1 1 d . . .
H5 H 0.6391 1.1920 0.3476 0.063 Uiso 1 1 calc R . .
C3 C 0.8244(6) 1.1057(4) 0.5732(4) 0.0492(10) Uani 1 1 d . . .
H3 H 0.8875 1.1445 0.6478 0.059 Uiso 1 1 calc R . .
C9 C 0.7601(6) 0.4457(4) 0.7507(3) 0.0442(9) Uani 1 1 d . . .
H9 H 0.6878 0.3470 0.7417 0.053 Uiso 1 1 calc R . .
C7 C 0.8320(5) 0.8790(4) 0.6101(3) 0.0383(8) Uani 1 1 d . . .
C6 C 0.6330(6) 0.9928(4) 0.3495(4) 0.0441(9) Uani 1 1 d . . .
C13 C 0.8392(5) 0.6725(4) 0.6827(3) 0.0360(7) Uani 1 1 d . . .
C12 C 0.9734(6) 0.7348(5) 0.7801(3) 0.0478(9) Uani 1 1 d . . .
H12 H 1.0471 0.8333 0.7894 0.057 Uiso 1 1 calc R . .
C4 C 0.7720(6) 1.1881(4) 0.5042(5) 0.0559(11) Uani 1 1 d . . .
H4 H 0.8011 1.2851 0.5314 0.067 Uiso 1 1 calc R . .
C11 C 1.0003(6) 0.6545(5) 0.8634(4) 0.0534(10) Uani 1 1 d . . .
H11 H 1.0902 0.6977 0.9292 0.064 Uiso 1 1 calc R . .
C10 C 0.8926(7) 0.5100(5) 0.8481(4) 0.0536(10) Uani 1 1 d . . .
H10 H 0.9090 0.4542 0.9041 0.064 Uiso 1 1 calc R . .
C15 C 0.4704(9) 1.0083(6) 0.1707(5) 0.0747(16) Uani 1 1 d . . .
H15A H 0.4070 0.9490 0.0983 0.112 Uiso 1 1 calc R . .
H15B H 0.5741 1.0913 0.1580 0.112 Uiso 1 1 calc R . .
H15C H 0.3838 1.0398 0.2066 0.112 Uiso 1 1 calc R . .
C14 C 0.7686(7) 0.5198(4) 0.3420(4) 0.0511(10) Uani 1 1 d . . .
H14A H 0.7778 0.4365 0.3726 0.077 Uiso 1 1 calc R . .
H14B H 0.8922 0.5853 0.3349 0.077 Uiso 1 1 calc R . .
H14C H 0.6904 0.4896 0.2676 0.077 Uiso 1 1 calc R . .
C1S C 0.6879(9) 0.7170(6) 1.0887(5) 0.0771(16) Uani 1 1 d . . .
H1S1 H 0.6378 0.7267 1.1590 0.093 Uiso 1 1 calc R . .
H1S2 H 0.7234 0.6333 1.0876 0.093 Uiso 1 1 calc R . .
H7 H 0.903(5) 0.929(4) 0.681(3) 0.030(9) Uiso 1 1 d . . .
 
loop_
 _atom_site_aniso_label
 _atom_site_aniso_U_11
 _atom_site_aniso_U_22
 _atom_site_aniso_U_33
 _atom_site_aniso_U_23
 _atom_site_aniso_U_13
 _atom_site_aniso_U_12
Ga1 0.0432(2) 0.02402(18) 0.0318(2) 0.00397(13) 0.00360(14) 0.01263(14)
Cl1 0.1298(16) 0.0799(10) 0.0946(12) 0.0184(9) -0.0250(11) 0.0326(10)
Cl2 0.1233(17) 0.1088(15) 0.1287(18) -0.0463(13) 0.0467(14) -0.0206(12)
O1 0.0674(18) 0.0256(11) 0.0392(14) 0.0044(10) 0.0001(12) 0.0164(12)
O2 0.0451(14) 0.0291(11) 0.0306(12) 0.0073(9) -0.0013(10) 0.0102(10)
O3 0.086(2) 0.0438(15) 0.0535(19) 0.0168(14) 0.0001(16) 0.0297(16)
N1 0.0376(15) 0.0302(14) 0.0367(16) 0.0040(12) 0.0054(12) 0.0109(12)
C1 0.0388(18) 0.0246(14) 0.044(2) 0.0106(14) 0.0139(15) 0.0101(13)
C2 0.0366(18) 0.0249(15) 0.049(2) 0.0034(14) 0.0116(15) 0.0097(13)
C8 0.0361(17) 0.0363(17) 0.0330(17) 0.0062(14) 0.0037(14) 0.0151(14)
C5 0.057(2) 0.0307(18) 0.080(3) 0.022(2) 0.020(2) 0.0217(17)
C3 0.051(2) 0.0274(17) 0.065(3) 0.0004(17) 0.015(2) 0.0100(16)
C9 0.053(2) 0.0427(19) 0.0363(19) 0.0107(16) 0.0023(17) 0.0173(17)
C7 0.0379(18) 0.0306(16) 0.042(2) 0.0005(14) 0.0072(15) 0.0090(14)
C6 0.048(2) 0.0310(17) 0.057(2) 0.0162(17) 0.0143(18) 0.0159(15)
C13 0.0392(18) 0.0366(17) 0.0335(17) 0.0044(14) 0.0050(14) 0.0163(14)
C12 0.050(2) 0.048(2) 0.037(2) -0.0011(17) -0.0043(17) 0.0137(18)
C4 0.059(3) 0.0253(17) 0.084(3) 0.0063(19) 0.020(2) 0.0149(17)
C11 0.052(2) 0.062(3) 0.039(2) 0.0075(19) -0.0064(18) 0.017(2)
C10 0.061(3) 0.061(3) 0.039(2) 0.0154(19) -0.0037(19) 0.025(2)
C15 0.096(4) 0.075(3) 0.071(3) 0.037(3) 0.008(3) 0.048(3)
C14 0.072(3) 0.0364(19) 0.051(2) 0.0068(17) 0.019(2) 0.0247(19)
C1S 0.094(4) 0.059(3) 0.069(3) 0.002(3) 0.001(3) 0.023(3)
 
_geom_special_details
;
 All esds (except the esd in the dihedral angle between two l.s. planes)
 are estimated using the full covariance matrix.  The cell esds are taken
 into account individually in the estimation of esds in distances, angles
 and torsion angles; correlations between esds in cell parameters are only
 used when they are defined by crystal symmetry.  An approximate (isotropic)
 treatment of cell esds is used for estimating esds involving l.s. planes.
;
 
loop_
 _geom_bond_atom_site_label_1
 _geom_bond_atom_site_label_2
 _geom_bond_distance
 _geom_bond_site_symmetry_2
 _geom_bond_publ_flag
Ga1 O1 1.870(3) . ?
Ga1 C14 1.924(4) . ?
Ga1 O2 1.932(3) 2_666 ?
Ga1 N1 1.992(3) . ?
Ga1 O2 2.126(3) . ?
Cl1 C1S 1.733(6) . ?
Cl2 C1S 1.712(6) . ?
O1 C1 1.287(4) . ?
O2 C8 1.341(4) . ?
O2 Ga1 1.932(3) 2_666 ?
O3 C6 1.359(5) . ?
O3 C15 1.398(5) . ?
N1 C7 1.282(5) . ?
N1 C13 1.402(5) . ?
C1 C6 1.399(5) . ?
C1 C2 1.401(5) . ?
C2 C3 1.399(5) . ?
C2 C7 1.398(5) . ?
C8 C9 1.378(5) . ?
C8 C13 1.379(5) . ?
C5 C6 1.347(5) . ?
C5 C4 1.390(7) . ?
C5 H5 0.9300 . ?
C3 C4 1.339(6) . ?
C3 H3 0.9300 . ?
C9 C10 1.375(6) . ?
C9 H9 0.9300 . ?
C7 H7 0.93(4) . ?
C13 C12 1.380(5) . ?
C12 C11 1.369(6) . ?
C12 H12 0.9300 . ?
C4 H4 0.9300 . ?
C11 C10 1.364(7) . ?
C11 H11 0.9300 . ?
C10 H10 0.9300 . ?
C15 H15A 0.9600 . ?
C15 H15B 0.9600 . ?
C15 H15C 0.9600 . ?
C14 H14A 0.9600 . ?
C14 H14B 0.9600 . ?
C14 H14C 0.9600 . ?
C1S H1S1 0.9700 . ?
C1S H1S2 0.9700 . ?
 
loop_
 _geom_angle_atom_site_label_1
 _geom_angle_atom_site_label_2
 _geom_angle_atom_site_label_3
 _geom_angle
 _geom_angle_site_symmetry_1
 _geom_angle_site_symmetry_3
 _geom_angle_publ_flag
O1 Ga1 C14 103.73(16) . . ?
O1 Ga1 O2 93.55(12) . 2_666 ?
C14 Ga1 O2 115.89(17) . 2_666 ?
O1 Ga1 N1 92.64(13) . . ?
C14 Ga1 N1 125.58(17) . . ?
O2 Ga1 N1 114.35(12) 2_666 . ?
O1 Ga1 O2 157.84(12) . . ?
C14 Ga1 O2 98.33(15) . . ?
O2 Ga1 O2 74.70(11) 2_666 . ?
N1 Ga1 O2 75.94(11) . . ?
C1 O1 Ga1 128.5(3) . . ?
C8 O2 Ga1 124.8(2) . 2_666 ?
C8 O2 Ga1 112.5(2) . . ?
Ga1 O2 Ga1 105.30(11) 2_666 . ?
C6 O3 C15 118.8(4) . . ?
C7 N1 C13 119.9(3) . . ?
C7 N1 Ga1 123.7(3) . . ?
C13 N1 Ga1 116.4(2) . . ?
O1 C1 C6 117.0(4) . . ?
O1 C1 C2 123.3(3) . . ?
C6 C1 C2 119.7(3) . . ?
C3 C2 C7 115.7(4) . . ?
C3 C2 C1 119.7(4) . . ?
C7 C2 C1 124.6(3) . . ?
O2 C8 C9 124.3(3) . . ?
O2 C8 C13 117.2(3) . . ?
C9 C8 C13 118.5(3) . . ?
C6 C5 C4 121.0(4) . . ?
C6 C5 H5 119.5 . . ?
C4 C5 H5 119.5 . . ?
C4 C3 C2 118.9(4) . . ?
C4 C3 H3 120.5 . . ?
C2 C3 H3 120.5 . . ?
C10 C9 C8 120.8(4) . . ?
C10 C9 H9 119.6 . . ?
C8 C9 H9 119.6 . . ?
N1 C7 C2 125.9(4) . . ?
N1 C7 H7 117(2) . . ?
C2 C7 H7 117(2) . . ?
C5 C6 O3 125.4(4) . . ?
C5 C6 C1 119.0(4) . . ?
O3 C6 C1 115.7(3) . . ?
C8 C13 C12 119.9(3) . . ?
C8 C13 N1 112.8(3) . . ?
C12 C13 N1 127.3(3) . . ?
C11 C12 C13 121.3(4) . . ?
C11 C12 H12 119.4 . . ?
C13 C12 H12 119.4 . . ?
C3 C4 C5 121.7(4) . . ?
C3 C4 H4 119.2 . . ?
C5 C4 H4 119.2 . . ?
C12 C11 C10 118.7(4) . . ?
C12 C11 H11 120.7 . . ?
C10 C11 H11 120.7 . . ?
C11 C10 C9 120.8(4) . . ?
C11 C10 H10 119.6 . . ?
C9 C10 H10 119.6 . . ?
O3 C15 H15A 109.5 . . ?
O3 C15 H15B 109.5 . . ?
H15A C15 H15B 109.5 . . ?
O3 C15 H15C 109.5 . . ?
H15A C15 H15C 109.5 . . ?
H15B C15 H15C 109.5 . . ?
Ga1 C14 H14A 109.5 . . ?
Ga1 C14 H14B 109.5 . . ?
H14A C14 H14B 109.5 . . ?
Ga1 C14 H14C 109.5 . . ?
H14A C14 H14C 109.5 . . ?
H14B C14 H14C 109.5 . . ?
Cl2 C1S Cl1 112.9(4) . . ?
Cl2 C1S H1S1 109.0 . . ?
Cl1 C1S H1S1 109.0 . . ?
Cl2 C1S H1S2 109.0 . . ?
Cl1 C1S H1S2 109.0 . . ?
H1S1 C1S H1S2 107.8 . . ?
 
loop_
 _geom_torsion_atom_site_label_1
 _geom_torsion_atom_site_label_2
 _geom_torsion_atom_site_label_3
 _geom_torsion_atom_site_label_4
 _geom_torsion
 _geom_torsion_site_symmetry_1
 _geom_torsion_site_symmetry_2
 _geom_torsion_site_symmetry_3
 _geom_torsion_site_symmetry_4
 _geom_torsion_publ_flag
C14 Ga1 O1 C1 -139.3(3) . . . . ?
O2 Ga1 O1 C1 102.9(3) 2_666 . . . ?
N1 Ga1 O1 C1 -11.7(3) . . . . ?
O2 Ga1 O1 C1 46.2(5) . . . . ?
O1 Ga1 O2 C8 -79.0(4) . . . . ?
C14 Ga1 O2 C8 106.4(3) . . . . ?
O2 Ga1 O2 C8 -138.9(3) 2_666 . . . ?
N1 Ga1 O2 C8 -18.3(2) . . . . ?
O1 Ga1 O2 Ga1 59.9(3) . . . 2_666 ?
C14 Ga1 O2 Ga1 -114.67(18) . . . 2_666 ?
O2 Ga1 O2 Ga1 0.0 2_666 . . 2_666 ?
N1 Ga1 O2 Ga1 120.61(14) . . . 2_666 ?
O1 Ga1 N1 C7 3.4(3) . . . . ?
C14 Ga1 N1 C7 112.4(3) . . . . ?
O2 Ga1 N1 C7 -91.7(3) 2_666 . . . ?
O2 Ga1 N1 C7 -157.4(3) . . . . ?
O1 Ga1 N1 C13 -178.7(3) . . . . ?
C14 Ga1 N1 C13 -69.7(3) . . . . ?
O2 Ga1 N1 C13 86.2(3) 2_666 . . . ?
O2 Ga1 N1 C13 20.5(2) . . . . ?
Ga1 O1 C1 C6 -165.7(3) . . . . ?
Ga1 O1 C1 C2 14.0(5) . . . . ?
O1 C1 C2 C3 177.6(4) . . . . ?
C6 C1 C2 C3 -2.7(5) . . . . ?
O1 C1 C2 C7 -5.2(6) . . . . ?
C6 C1 C2 C7 174.5(4) . . . . ?
Ga1 O2 C8 C9 64.9(4) 2_666 . . . ?
Ga1 O2 C8 C9 -165.7(3) . . . . ?
Ga1 O2 C8 C13 -115.9(3) 2_666 . . . ?
Ga1 O2 C8 C13 13.5(4) . . . . ?
C7 C2 C3 C4 -176.5(4) . . . . ?
C1 C2 C3 C4 1.0(6) . . . . ?
O2 C8 C9 C10 177.8(4) . . . . ?
C13 C8 C9 C10 -1.4(6) . . . . ?
C13 N1 C7 C2 -175.3(3) . . . . ?
Ga1 N1 C7 C2 2.6(5) . . . . ?
C3 C2 C7 N1 173.9(4) . . . . ?
C1 C2 C7 N1 -3.4(6) . . . . ?
C4 C5 C6 O3 179.6(4) . . . . ?
C4 C5 C6 C1 -0.7(6) . . . . ?
C15 O3 C6 C5 -2.8(7) . . . . ?
C15 O3 C6 C1 177.5(4) . . . . ?
O1 C1 C6 C5 -177.7(4) . . . . ?
C2 C1 C6 C5 2.6(6) . . . . ?
O1 C1 C6 O3 2.0(5) . . . . ?
C2 C1 C6 O3 -177.7(3) . . . . ?
O2 C8 C13 C12 -176.9(3) . . . . ?
C9 C8 C13 C12 2.3(5) . . . . ?
O2 C8 C13 N1 3.1(5) . . . . ?
C9 C8 C13 N1 -177.6(3) . . . . ?
C7 N1 C13 C8 158.1(3) . . . . ?
Ga1 N1 C13 C8 -20.0(4) . . . . ?
C7 N1 C13 C12 -21.9(6) . . . . ?
Ga1 N1 C13 C12 160.1(3) . . . . ?
C8 C13 C12 C11 -2.0(6) . . . . ?
N1 C13 C12 C11 178.0(4) . . . . ?
C2 C3 C4 C5 0.9(6) . . . . ?
C6 C5 C4 C3 -1.0(7) . . . . ?
C13 C12 C11 C10 0.7(7) . . . . ?
C12 C11 C10 C9 0.3(7) . . . . ?
C8 C9 C10 C11 0.1(7) . . . . ?
 
_diffrn_measured_fraction_theta_max    0.959
_diffrn_reflns_theta_full              28.18
_diffrn_measured_fraction_theta_full   0.959
_refine_diff_density_max    0.504
_refine_diff_density_min   -0.685
_refine_diff_density_rms    0.088
